# Supplementary material
Source: Springer Nature journal article supplement (https://www.springermedizin.de/resource/supplementary/12985_2010_1064_MOESM2_ESM.pdf/9609062)

**A.**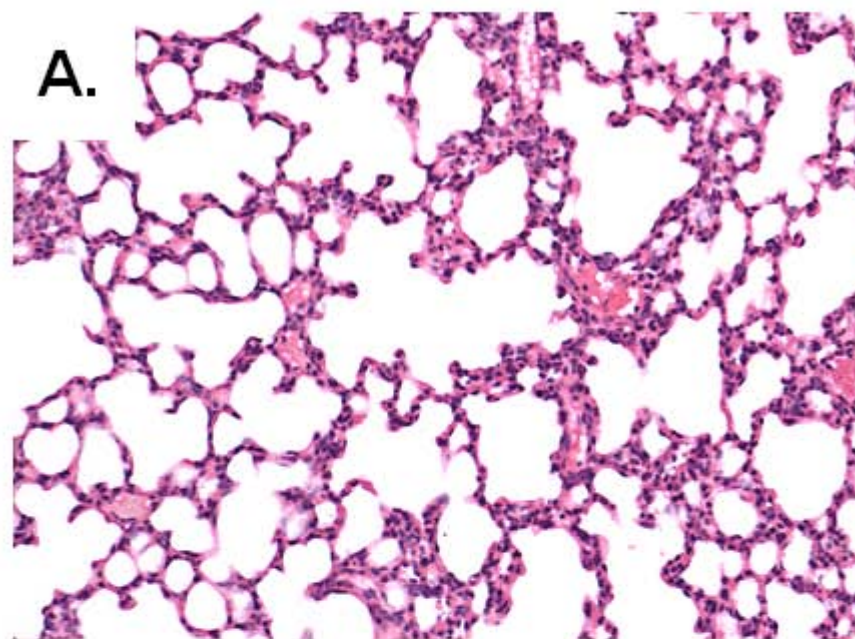**B.**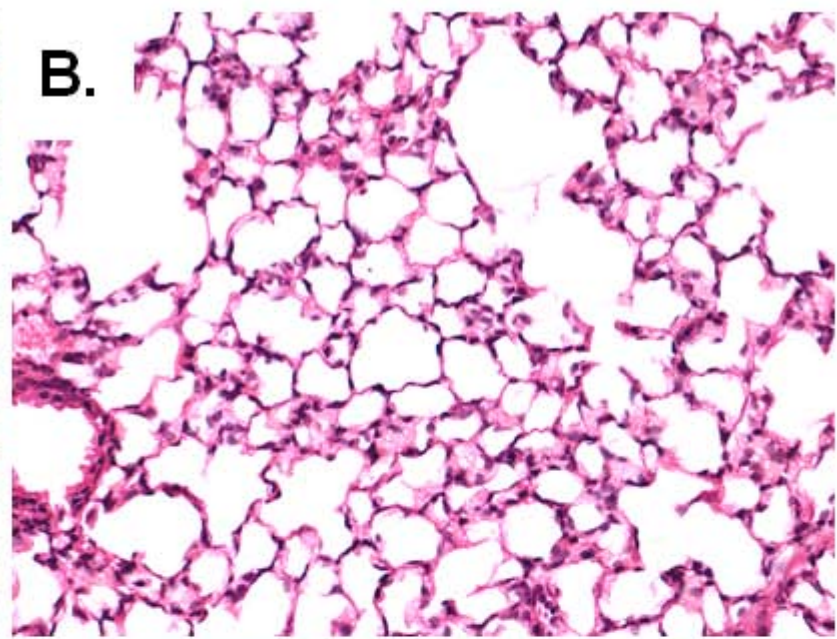**C.**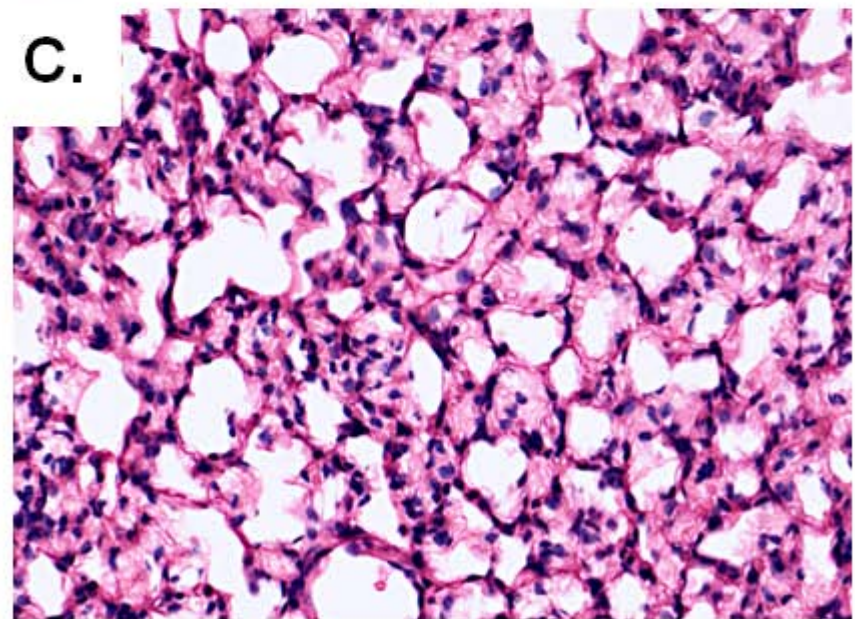**D.**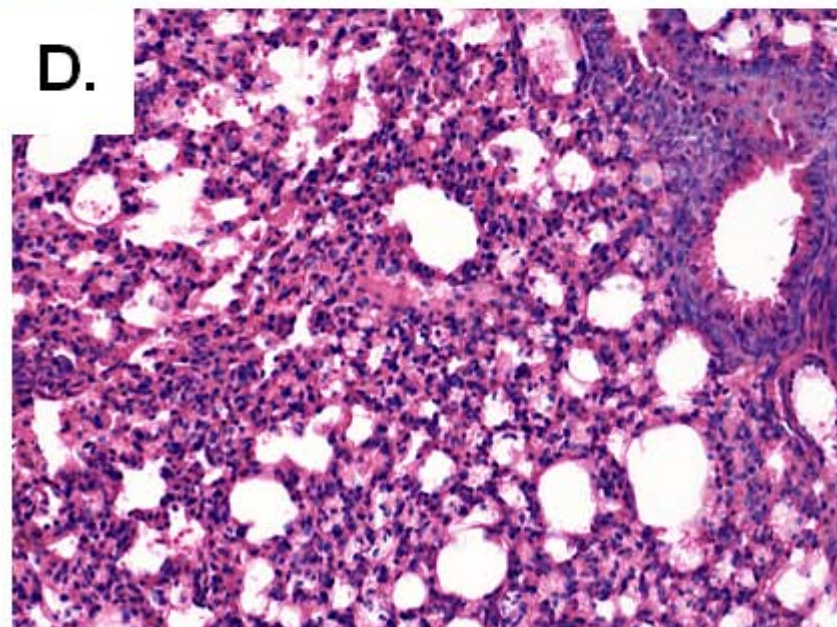

Supplement: MOESM2 [file 9609062]
